# Supplementary material for: A novel process to prepare a thin silica shell on the PDDA-stabilized spherical Au nanoparticles assisted by UV light irradiation
Source: Royal Society of Chemistry journal article supplement (doi:10.1039/c4ra09557j), 2014-01-01
Supplement: c4ra09557j1.pdf [file c4ra09557j1.pdf]

## Supporting Information

### **A novel process to prepare thin silica shell on the PDDA-stabilized spherical Au nanoparticles assisted by UV light irradiation**

Lifeng Hang,<sup>a,b</sup> Cuncheng Li,<sup>c</sup> Tao Zhang,<sup>c</sup> Xinyang Li,<sup>a</sup> Yanchun Wu<sup>a,b</sup>

Dandan Men,<sup>a,b</sup> Guangqiang Liu<sup>a</sup> and Yue Li,<sup>\*a,b</sup>

<sup>a</sup> Key Lab of Materials Physics, Anhui Key Lab of Nanomaterials and Nanotechnology, Institute of Solid State Physics, Chinese Academy of Sciences, Hefei 230031, P. R. China

<sup>b</sup> University of Science and Technology of China, Hefei 230026, P. R. China

<sup>c</sup> Key Laboratory of Chemical Sensing & Analysis in Universities of Shandong (University of Jinan), School of Chemistry and Chemical Engineering, University of Jinan, Jinan 250022, Shandong, P. R. China

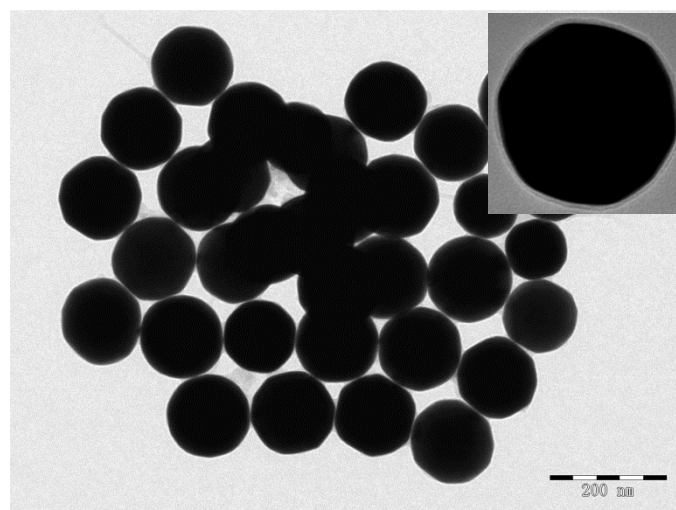

**Figure S1.** TEM image of core-shell nanoparticles obtained by UV light irradiated PDDA stabilized Au NPs and subsequent the polymerization reaction of silica under the PH=10, 0.2 vol% in 1.2 mL 2-propanol.

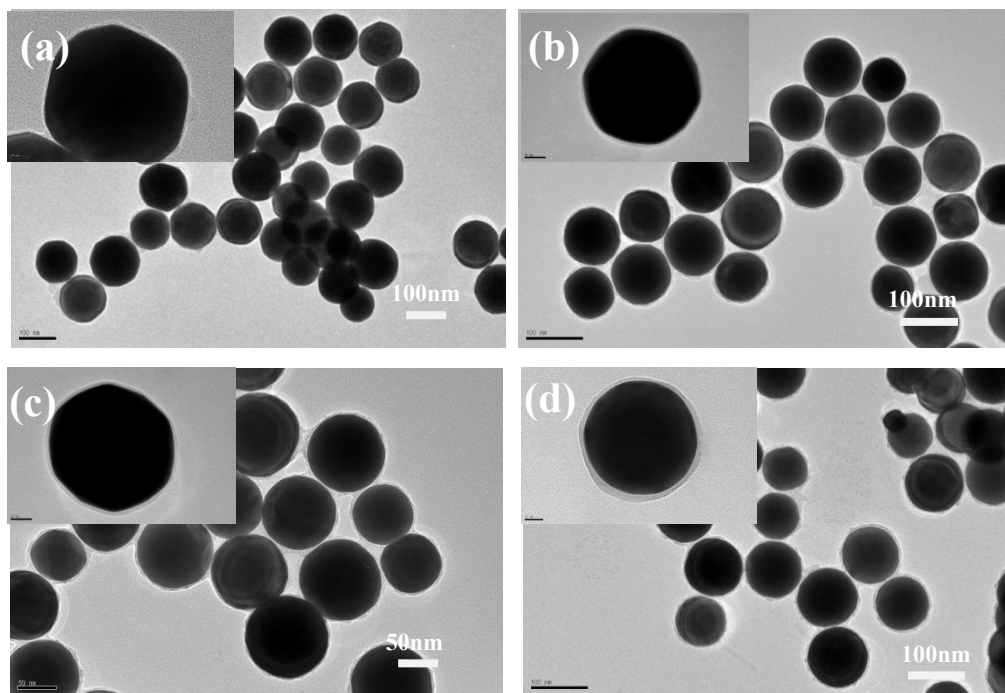

**Figure S2.** TEM images of Au@SiO<sub>2</sub> core-shell particles with different shell thicknesses under the PH=10, (a) 2 nm with 0.1 vol% in 1.2 mL 2-propanol, (b) 4 nm with 0.2 vol% in 1.2 mL 2-propanol, (c) 5 nm with 0.3 vol% in 1.2 mL 2-propanol, (d) 8 nm with 0.4 vol% in 1.2 mL 2-propanol.

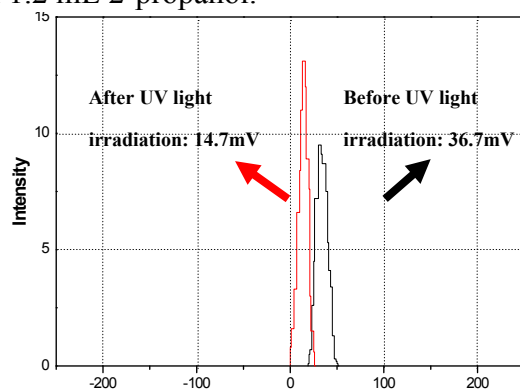

**Figure S3.** Black line is Zeta potential of pure PDDA-stabilized Au NPs, the red line is Zeta potential of Au NPs which were treated by ultraviolet light.

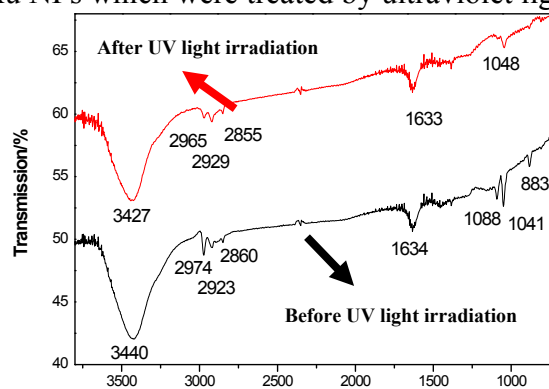

**Figure S4.** IR Spectrum of the PDDA-stabilized Au NPs, black line is PDDA-stabilized Au NPs without ultraviolet light treatment and red line is PDDA-stabilized

Au NPs after treated by UV light irradiation
